# Supplementary material for: Profiling the Typical Training Load of a Law Enforcement Recruit Class
Source: MDPI journal article supplement (doi:10.3390/ijerph192013457), 2022-10-18
Supplement: s1 [file s1]

**Supplemental Table S1.** Linear mixed effect model results.

| Week | Comparison | Difference (m) | <i>p</i> -Value | Week | Comparison | Difference (m) | <i>p</i> -Value |
|------|------------|----------------|-----------------|------|------------|----------------|-----------------|
| 1    | 2          | 9648.97        | < 0.01          | 10   | 11         | 133.21         | 1               |
|      | 3          | 9640.3         | < 0.01          |      | 12         | 553.79         | 1               |
|      | 4          | 11648.48       | < 0.01          |      | 13         | 1831.76        | 1               |
|      | 5          | 9689.17        | < 0.01          |      | 14         | 3294.5         | 0.99            |
|      | 6          | 10069.68       | < 0.01          |      | 15         | 5027.52        | 0.8             |
|      | 7          | 7511.02        | 0.95            |      | 16         | 1682.61        | 1               |
| 2    | 3          | -8.67          | 1               | 11   | 12         | -779.43        | 1               |
|      | 4          | 1999.5         | 1               |      | 13         | 498.54         | 1               |
|      | 5          | 40.2           | 1               |      | 14         | 1961.29        | 1               |
|      | 6          | 420.71         | 1               |      | 15         | 349.39         | 0.99            |
|      | 7          | -2137.95       | 1               |      | 16         | 3694.3         | 1               |
|      | 8          | -4415.36       | 0.93            |      | 17         | 2722.69        | 0.99            |
| 3    | 4          | 2008.173       | 1               | 12   | 13         | 1277.97        | 1               |
|      | 5          | 48.87          | 1               |      | 14         | 2740.72        | 0.99            |
|      | 6          | 429.38         | 1               |      | 15         | 4473.73        | 0.92            |
|      | 7          | -2129.29       | 1               |      | 16         | 1128.82        | 1               |
|      | 8          | -4406.69       | 0.93            |      | 17         | 3502.12        | 0.99            |
|      | 9          | -2590.97       | 0.99            |      | 18         | -4488.14       | 0.92            |
| 4    | 5          | -1959.31       | 1               | 13   | 14         | 1462.74        | 1               |
|      | 6          | -1578.8        | 1               |      | 15         | 3195.76        | 0.99            |
|      | 7          | -4137.46       | 0.96            |      | 16         | -149.15        | 1               |
|      | 8          | -6414.87       | 0.33            |      | 17         | 2224.15        | 1               |
|      | 9          | -4599.15       | 0.9             |      | 18         | -5766.11       | 0.55            |
|      | 10         | -4934.92       | 0.82            |      | 19         | -2685.52       | 0.99            |
| 5    | 6          | 380.51         | 1               | 14   | 15         | 1733.02        | 1               |

|   |    |          |      |    |    |           |        |
|---|----|----------|------|----|----|-----------|--------|
|   | 7  | -2178.15 | 1    |    | 16 | -1611.9   | 1      |
|   | 8  | -4455.56 | 0.93 |    | 17 | 761.4     | 1      |
|   | 9  | -2639.84 | 0.99 |    | 18 | -7228.85  | 1      |
|   | 10 | -2984.62 | 0.99 |    | 19 | -4148.37  | 0.14   |
|   | 11 | -1651.4  | 1    |    | 20 | -3458.58  | 0.96   |
| 6 | 7  | -2558.66 | 1    | 15 | 16 | -3344.91  | 0.99   |
|   | 8  | -4836.07 | 0.85 |    | 17 | -971.611  | 1      |
|   | 9  | -3020.35 | 0.99 |    | 18 | -8961.87  | < 0.01 |
|   | 10 | -3365.13 | 0.99 |    | 19 | -5881.38  | 0.51   |
|   | 11 | -2031.91 | 1    |    | 20 | -5191.59  | 0.75   |
|   | 12 | -2811.34 | 0.99 |    | 21 | -13163.96 | < 0.01 |
| 7 | 8  | -2277.41 | 1    | 16 | 17 | 2373.3    | 1      |
|   | 9  | -461.69  | 1    |    | 18 | -5616.96  | 0.61   |
|   | 10 | -806.46  | 1    |    | 19 | -2536.47  | 1      |
|   | 11 | 526.75   | 1    |    | 20 | -1846.68  | 1      |
|   | 12 | -252.68  | 1    |    | 21 | -9819.05  | < 0.01 |
|   | 13 | 1025.29  | 1    |    | 22 | -9693.09  | < 0.01 |
| 8 | 9  | 1815.72  | 1    | 17 | 18 | -7990.26  | 0.049  |
|   | 10 | 1470.94  | 1    |    | 19 | -4909.77  | 0.83   |
|   | 11 | 2804.16  | 0.99 |    | 20 | -4219.98  | 0.96   |
|   | 12 | 2024.73  | 1    |    | 21 | -12192.35 | < 0.01 |
|   | 13 | 3302.7   | 0.99 |    | 22 | -12066.39 | < 0.01 |
|   | 14 | 4765.45  | 0.87 | 18 | 19 | 3080.49   | 0.99   |
| 9 | 10 | -344.78  | 1    |    | 20 | 3770.27   | 0.99   |
|   | 11 | 988.4    | 1    |    | 21 | -4202.09  | 0.97   |
|   | 12 | 209.01   | 1    |    | 22 | -4076.13  | 0.98   |
|   | 13 | 1486.98  | 1    | 19 | 20 | 689.79    | 1      |

|    |         |      |    |    |          |      |
|----|---------|------|----|----|----------|------|
| 14 | 2949.73 | 0.99 |    | 21 | -7282.58 | 0.18 |
| 15 | 4682.74 | 0.88 |    | 22 | -7156.62 | 0.21 |
|    |         |      | 20 | 21 | -7972.38 | 0.08 |
|    |         |      |    | 22 | -7846.41 | 0.09 |
|    |         |      | 21 | 22 | 125.96   | 1    |
